# Supplementary material for: Oxidative addition reaction of diarylplatinum(ii) complexes with MeI in ionic liquid media: a kinetic study
Source: Royal Society of Chemistry journal article supplement (doi:10.1039/c0dt00282h), 2010-01-01
Supplement: c0dt00282h.pdf [file c0dt00282h.pdf]

**Supplementary Information**  
**Dalton Transactions**  
**DT-ART-04-2010-000282**

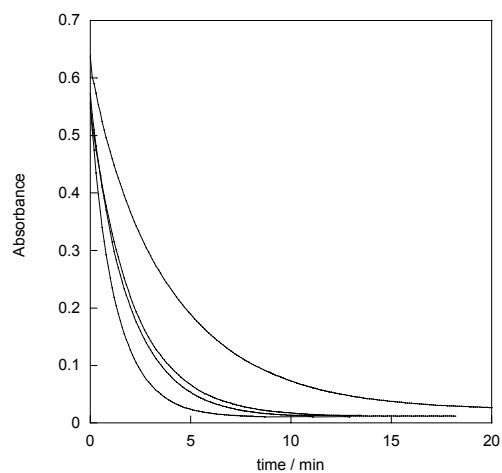

**Fig. 1S** Absorbance-time curves for the reaction of  $[\text{Pt}(p\text{-MeC}_6\text{H}_4)_2(\text{phen})]$ , **1a**, with MeI in  $[\text{bmim}][\text{bta}]$  at 25 °C.

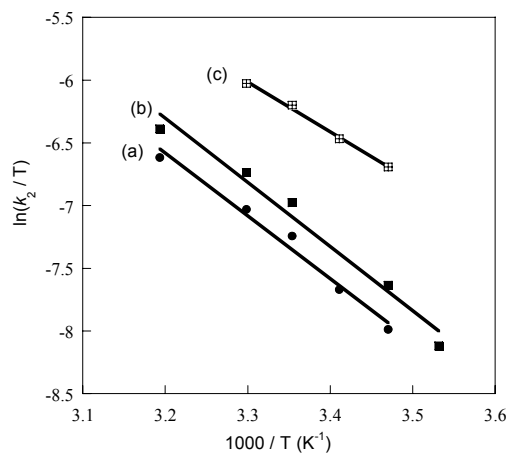

**Fig. 2S** Eyring plots for the reaction of MeI with (a)  $[\text{Pt}(p\text{-MeC}_6\text{H}_4)_2(\text{phen})]$ , **1a**, in  $[\text{bmim}][\text{bta}]$ , (b)  $[\text{Pt}(p\text{-MeC}_6\text{H}_4)_2(t\text{-Bu}_2\text{bpy})]$ , **1b**, in  $[\text{bmim}][\text{bta}]$  and (c)  $[\text{Pt}(p\text{-MeC}_6\text{H}_4)_2(\text{phen})]$ , **1a**, in  $[\text{bmim}][\text{BF}_4]$ .
